# Supplementary material for: Assessing the potential of biochar derived from sewage sludge for photoelectrode fabrication: methods, mechanisms, and conclusions
Source: Royal Society of Chemistry journal article supplement (doi:10.1039/d3ta03147k), 2023-01-01
Supplement: d3ta03147k1.pdf [file d3ta03147k1.pdf]

1

## Supporting information

2 **Assessing the Potential of Biochar Derived from Sewage Sludge for Photoelectrode**

3 **Fabrication: Methods, Mechanisms, and Conclusions**

4 Chuangxin Peng<sup>a1</sup>, Jing Huang<sup>b1</sup>, Min Ruan<sup>c</sup>, Haihao Peng<sup>a</sup>, Meiyong Jia<sup>d</sup>, Jing Tong<sup>a</sup>,

5 Weiping Xiong<sup>a\*</sup>, Zhaohui Yang<sup>a\*</sup>

6

7 *a College of Environmental Science and Engineering, Hunan University, Changsha 410082, P.R.*

8 *China;*

9 *b State Key Laboratory of Utilization of Woody Oil Resource, Hunan Academy of Forestry,*

10 *Changsha 410004, PR China;*

11 *c School of Energy and Power Engineering, Changsha University of Science & Technology,*

12 *Changsha 410076, PR China;*

13 *d College of Environmental Science and Engineering, Central South University of Forestry*

14 *Technology, Changsha 410004, P.R. China;*

15

16 \* Corresponding author at: College of Environmental Science and Engineering, Hunan University, Changsha 410082, P.R. China;

17 E-mail address: xiongweiping@hnu.edu.cn (W.P. Xiong)

18 College of Environmental Science and Engineering, Hunan University, Changsha 410082, P.R. China;

19 E-mail address: yzh@hnu.edu.cn (Z.H. Yang)

20 1            These            authors            contributed            equally            to            this            article.

21 Text 1: To explore the effect of different biochar dosing amounts on TC degradation,  
22 four gradients of 200mg, 300mg, 400mg, and 500mg were set for the specific biochar  
23 dosing levels. To explore the effect of different annealing temperatures on the effect of  
24 TC degradation, three temperature gradients of 250°C, 350°C, and 450°C were set to  
25 fabricate the electrodes.

26 Text 2 : Samples were filtered through 0.22 µm cellulose acetate syringe membrane  
27 filters, and TC concentration was determined by (HPLC, Agilent 1260 series, USA)  
28 and Agilent TC-C18 column (4.6 × 250 mm, 5 µm). The mobile phase was a mixture  
29 of 80% formic acid and 20% acetonitrile. The flow rate and injection volumes were 0.5  
30 mL/min and 20 µL, respectively. The wavelength of the detector was set to 354 nm.  
31 The retention time of TC was 3.5 min.

32 Text 3 : Determination of the photodegradation intermediates of TC was carried out on  
33 an LC-MS system equipped with a 6460 HPLC (Agilent, USA) and an API 3000 mass  
34 analyzer. The HPLC column was a Kromasil C18 column (4.6 × 100 mm) from Agilent.  
35 0.1% of formic acid aqueous solution and acetonitrile were used as mobile phases A  
36 and B, respectively. The eluent flow rate keeps at 0.45 mL/min. An injection volume  
37 of 10 µL was used in the analysis, and the column temperature at 302 K (30°C). Linear  
38 gradient elution as follows: The gradient solvent was as followed: A=90% (0 min), 10%  
39 (10 min), 10% (14 min), 90% (15 min), 90% (16 min). Max pressure limit: 1300 bar.

40 Text 4: The biochar electrode is used as the anode, the Platinum sheet electrode as the  
41 counter electrode, and Ag/AgCl as the reference electrode. The biochar electrode and  
42 the platinum sheet electrode were placed at an angle of 120°. The light-facing side of

43 the biochar electrode is connected to the platinum sheet of the platinum sheet electrode  
44 clip. A bias voltage of 1.5V was applied after the open circuit voltage was stabilized.  
45 The lamp is turned on after the current is stabilized.

46 Text 5 : The cost of the photoelectrode includes chemicals, equipment, and time. In  
47 this part, we considered the cost of chemical and electricity used for corresponding  
48 equipment. The chemicals used include foam nickel (\$3.79/0.06m<sup>3</sup>), gelatin  
49 (\$7.58/500g), sodium dodecyl sulfate (\$3.94/500g), high-purity nitrogen gas  
50 (\$16.83/40L), high-purity argon gas (\$22.44/40L), ethanol (\$5.61/5L) and acetone  
51 (\$4.14/500ml). Each foam nickel can prepare 45 substrates. To prepare 4  
52 photocathodes, the following are needed: 0.4 grams of gelatin, 10mg of sodium dodecyl  
53 sulfate, 0.045L nitrogen gas (0.03Mpa), and 1.071L argon gas (0.03Mpa); 40 ml of both  
54 ethanol and acetone each. In the end, the chemical cost of producing each  
55 photoelectrode is \$0.12. The power of the tube furnace is 1.2kw, the power of the freeze  
56 dryer is 0.85kw, and the cost of electricity is \$0.125 per Kw\*h. To prepare 1  
57 photocathode, the tube furnace consumes 0.02754 Kw\*h of electricity, and the freeze  
58 dryer consumes 0.3699 Kw\*h of electricity. Therefore, the electricity cost of producing  
59 each photoelectrode is \$0.25. Without taking into account equipment loss and labor  
60 costs, the production cost of each photocathode is only \$0.37. For a large synthesis, the  
61 average cost could be lower.

62

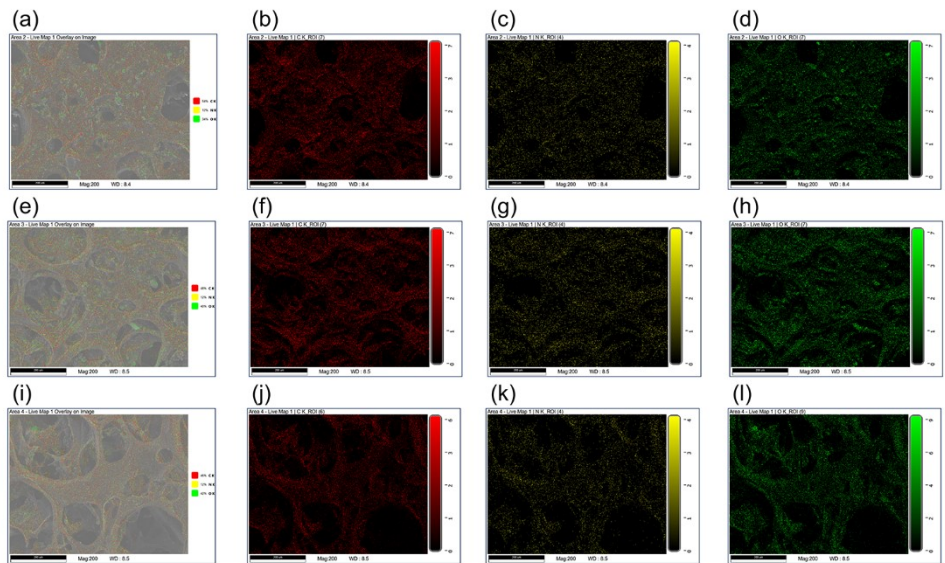

63 Fig. S 1 EDS elemental mapping of BCPE-700(a-d); BCPE-800(e-h) and BCPE-  
 64 900(i-l).

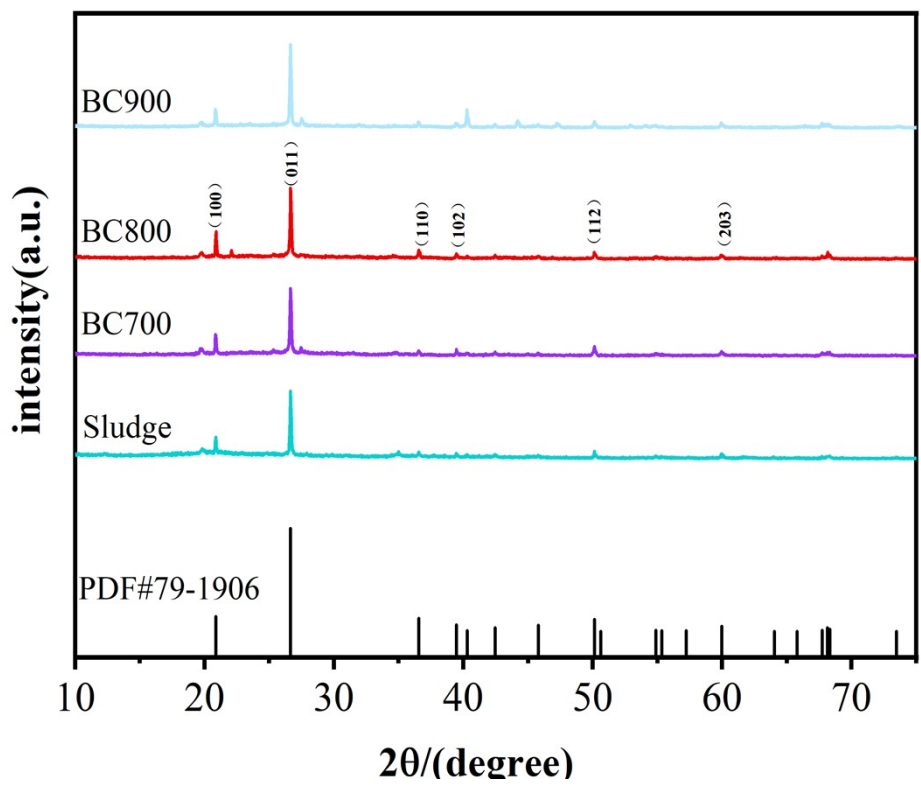

65 Fig. S2 XRD pattern of Sludge and BC.

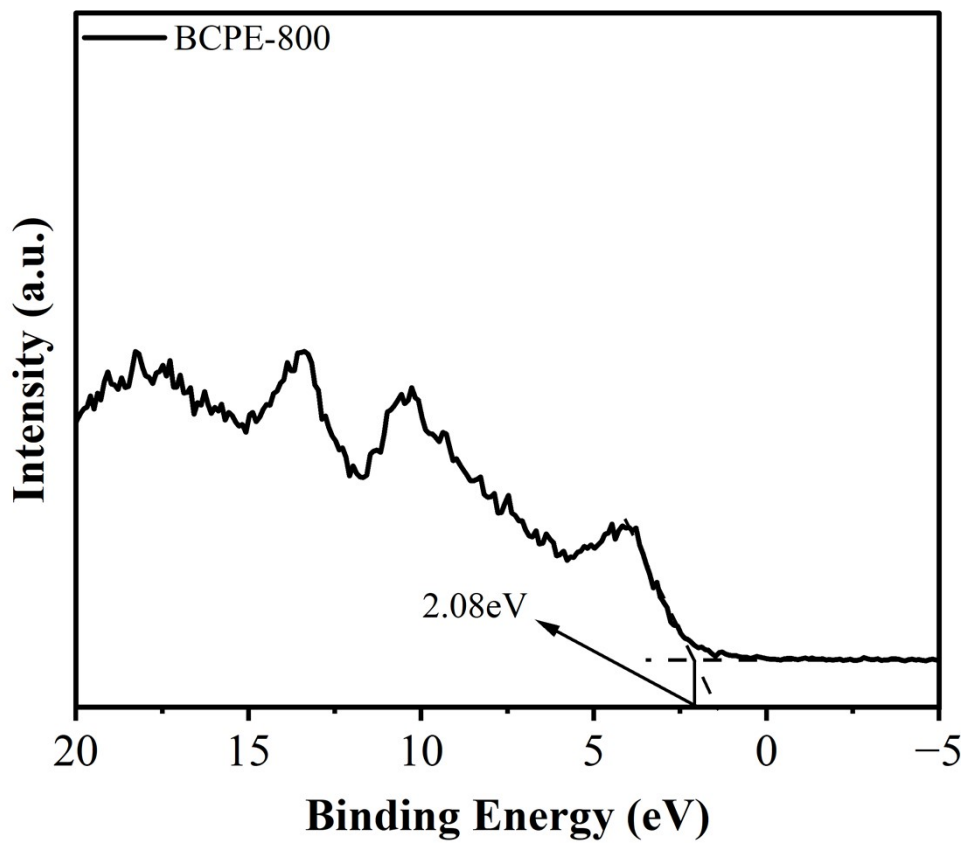

66

Fig. S3 VB-XPS spectroscopy of BCPE-800.

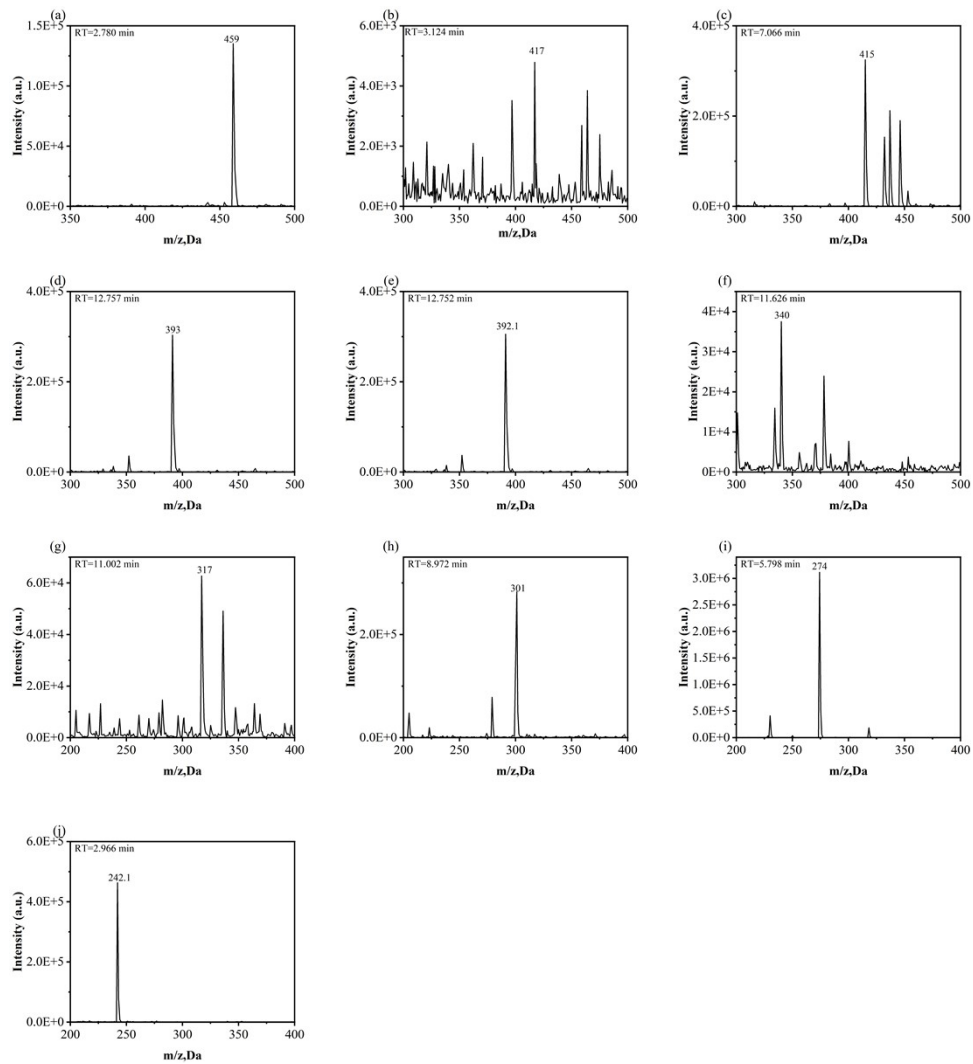

67

68

Fig. S4 LC-MS analysis of TC intermediates by BCPE-800.

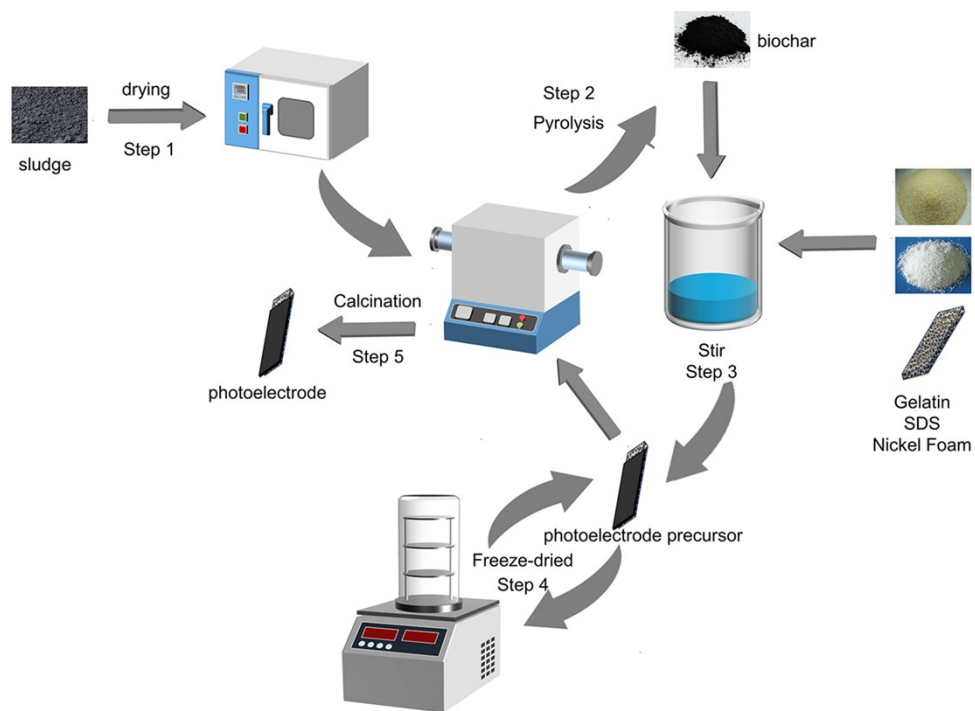

Fig. S5 Preparation process diagram of biochar photoelectrode.

(a)

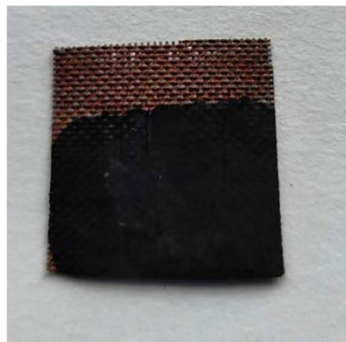

(b)

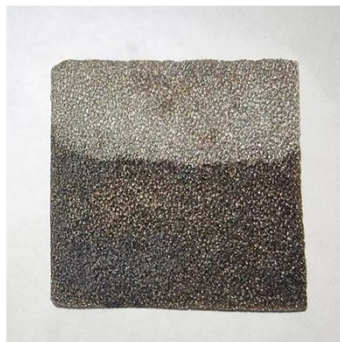

(c)

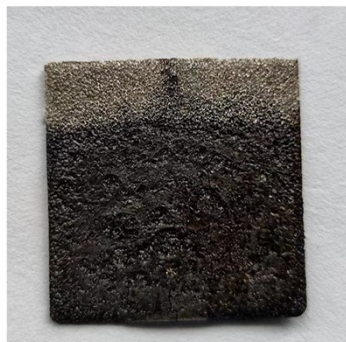

(d)

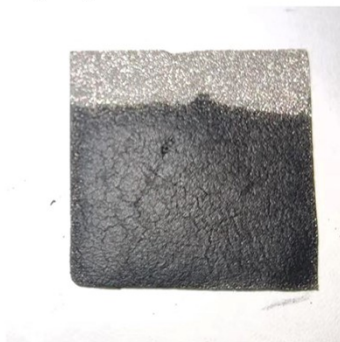

70 Fig. S6 Comparison of the morphology of photoelectrodes prepared by different

71 methods.

72



73 Table S1 The surface properties of SSBC with different pyrolysis temperatures.

| Material | BET Surface Area<br>(m <sup>2</sup> /g) | Total pore volume<br>(cm <sup>3</sup> /g) |
|----------|-----------------------------------------|-------------------------------------------|
| Sludge   | 16.27                                   | 0.05753                                   |
| BC-700   | 67.53                                   | 0.1735                                    |
| BC-800   | 83.40                                   | 0.1631                                    |
| BC-900   | 141.4                                   | 0.2085                                    |

74

75 Table S2 The composition and ratio of each sample were measured by XPS.

| element (%) | N     | C     | O     | H    | N/C  | H/C  | O/C  |
|-------------|-------|-------|-------|------|------|------|------|
| Category    |       |       |       |      |      |      |      |
| Sludge      | 3.89  | 26.78 | 26.56 | 4.21 | 0.15 | 0.16 | 0.99 |
| BC-700      | 1.40  | 15.66 | 11.11 | 0.60 | 0.09 | 0.04 | 0.71 |
| BC-800      | 0.83  | 15.07 | 7.74  | 0.46 | 0.06 | 0.03 | 0.51 |
| BC-900      | 0.50  | 14.55 | 7.13  | 0.31 | 0.03 | 0.02 | 0.49 |
| Gelatin     | 16.62 | 52.65 | 26.01 | 5.26 | 0.32 | 0.10 | 0.49 |
| BCPE-700    | 9.11  | 33.31 | 18.71 | 2.82 | 0.27 | 0.08 | 0.56 |
| BCPE-800    | 8.55  | 32.82 | 17.97 | 2.70 | 0.26 | 0.08 | 0.55 |
| BCPE-900    | 8.56  | 33.27 | 15.95 | 2.73 | 0.26 | 0.08 | 0.48 |

76

77 Table S3 Variation of TOC with degradation time.

| Time (min)     | 0     | 15    | 30    | 45    | 60    |
|----------------|-------|-------|-------|-------|-------|
| TOC (mg/L)     | 8.962 | 9.978 | 2.410 | 1.611 | 1.715 |
| Efficiency (%) | 0.00  | 11.34 | 73.11 | 82.02 | 80.86 |

78

79 Table S4 The quality parameters of tap water, river water and medical wastewater.

| Parameters | Tap water                | River water              | Medical wastewater       |
|------------|--------------------------|--------------------------|--------------------------|
| pH         | 7.13                     | 7.67                     | 7.72                     |
| TOC        | 0.603 mg•L <sup>-1</sup> | 22.61 mg•L <sup>-1</sup> | 64.23 mg•L <sup>-1</sup> |

80

81 Table S5 Information and proposed structure of the degradation intermediates from

82 TC.

| Products | Molecular Formula                                             | m/z | Proposed Structure                                                                   |
|----------|---------------------------------------------------------------|-----|--------------------------------------------------------------------------------------|
| TC       | C <sub>22</sub> H <sub>24</sub> N <sub>2</sub> O <sub>8</sub> | 445 | 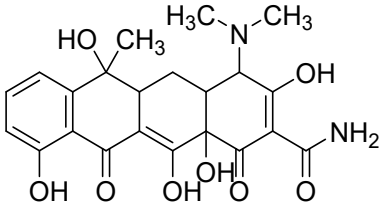  |
| P1       | C <sub>20</sub> H <sub>20</sub> N <sub>2</sub> O <sub>8</sub> | 417 |  |
| P2       | C <sub>20</sub> H <sub>27</sub> NO <sub>7</sub>               | 393 |  |
| P3       | C <sub>17</sub> H <sub>16</sub> O <sub>6</sub>                | 317 |  |
| P4       | C <sub>17</sub> H <sub>16</sub> O <sub>5</sub>                | 301 |  |

|     |                      |       |                                                                                       |
|-----|----------------------|-------|---------------------------------------------------------------------------------------|
| P5  | $C_{16}H_{18}O_4$    | 274   | 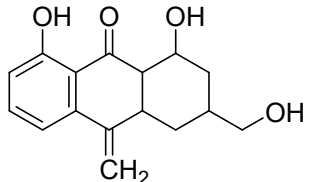    |
| P6  | $C_{22}H_{22}N_2O_9$ | 459   |     |
| P7  | $C_{20}H_{20}N_2O_8$ | 415   |     |
| P8  | $C_{19}H_{21}N_1O_8$ | 392.1 |    |
| P9  | $C_{19}H_{19}NO_5$   | 340   |   |
| P10 | $C_{16}H_{15}NO_5$   | 301   |   |
| P11 | $C_{12}H_{19}NO_4$   | 242.1 |  |
